# Supplementary material for: Mechanical and chemical analysis of plasma and ultraviolet–ozone surface treatments for thermal bonding of polymeric microfluidic devices
Source: Royal Society of Chemistry journal article supplement (doi:10.1039/b700442g), 2007-01-01
Supplement: b700442g.pdf [file b700442g.pdf]

# Mechanical and Chemical Analysis of Plasma and Ultraviolet-Ozone Surface Treatments for Thermal Bonding of Polymeric Microfluidic Devices

Arpita Bhattacharyya and Catherine M. Klapperich

## Supplementary Figures

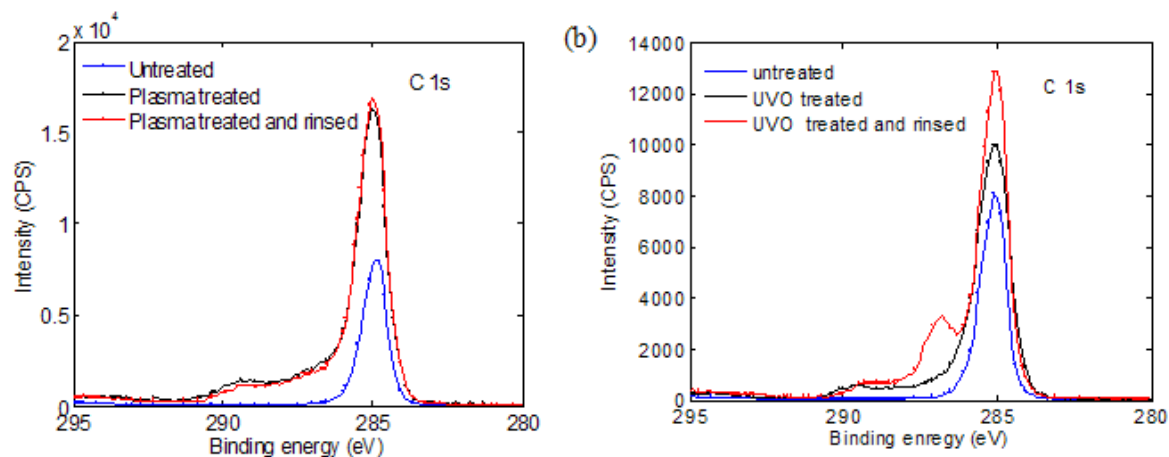

**Fig. S1** High resolution C 1s band for Zeonor 750R which were (a) plasma treated, (b) UVO treated

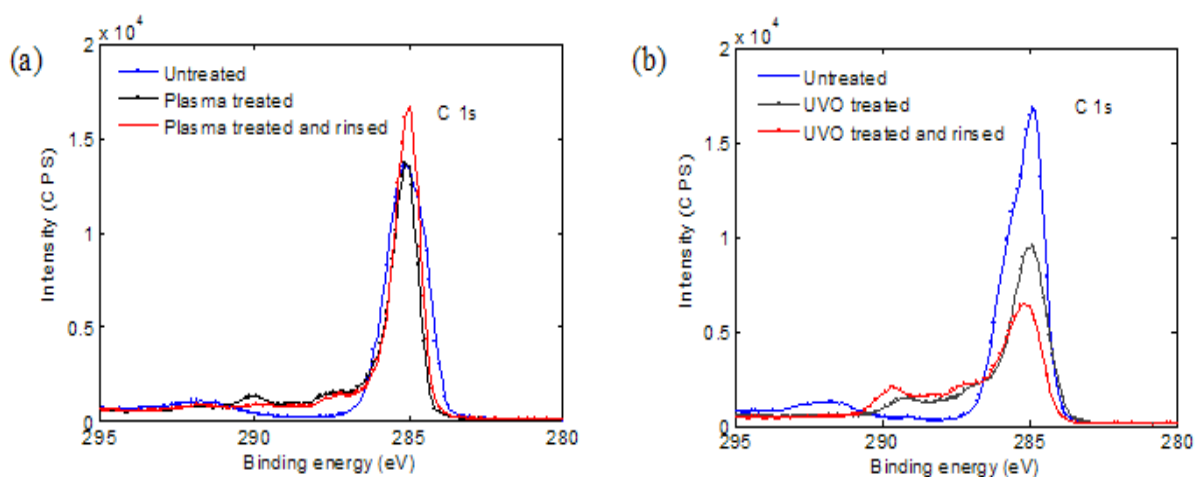

**Fig. S2** High resolution C 1s band for polystyrene which were (a) plasma treated, (b) UVO treated

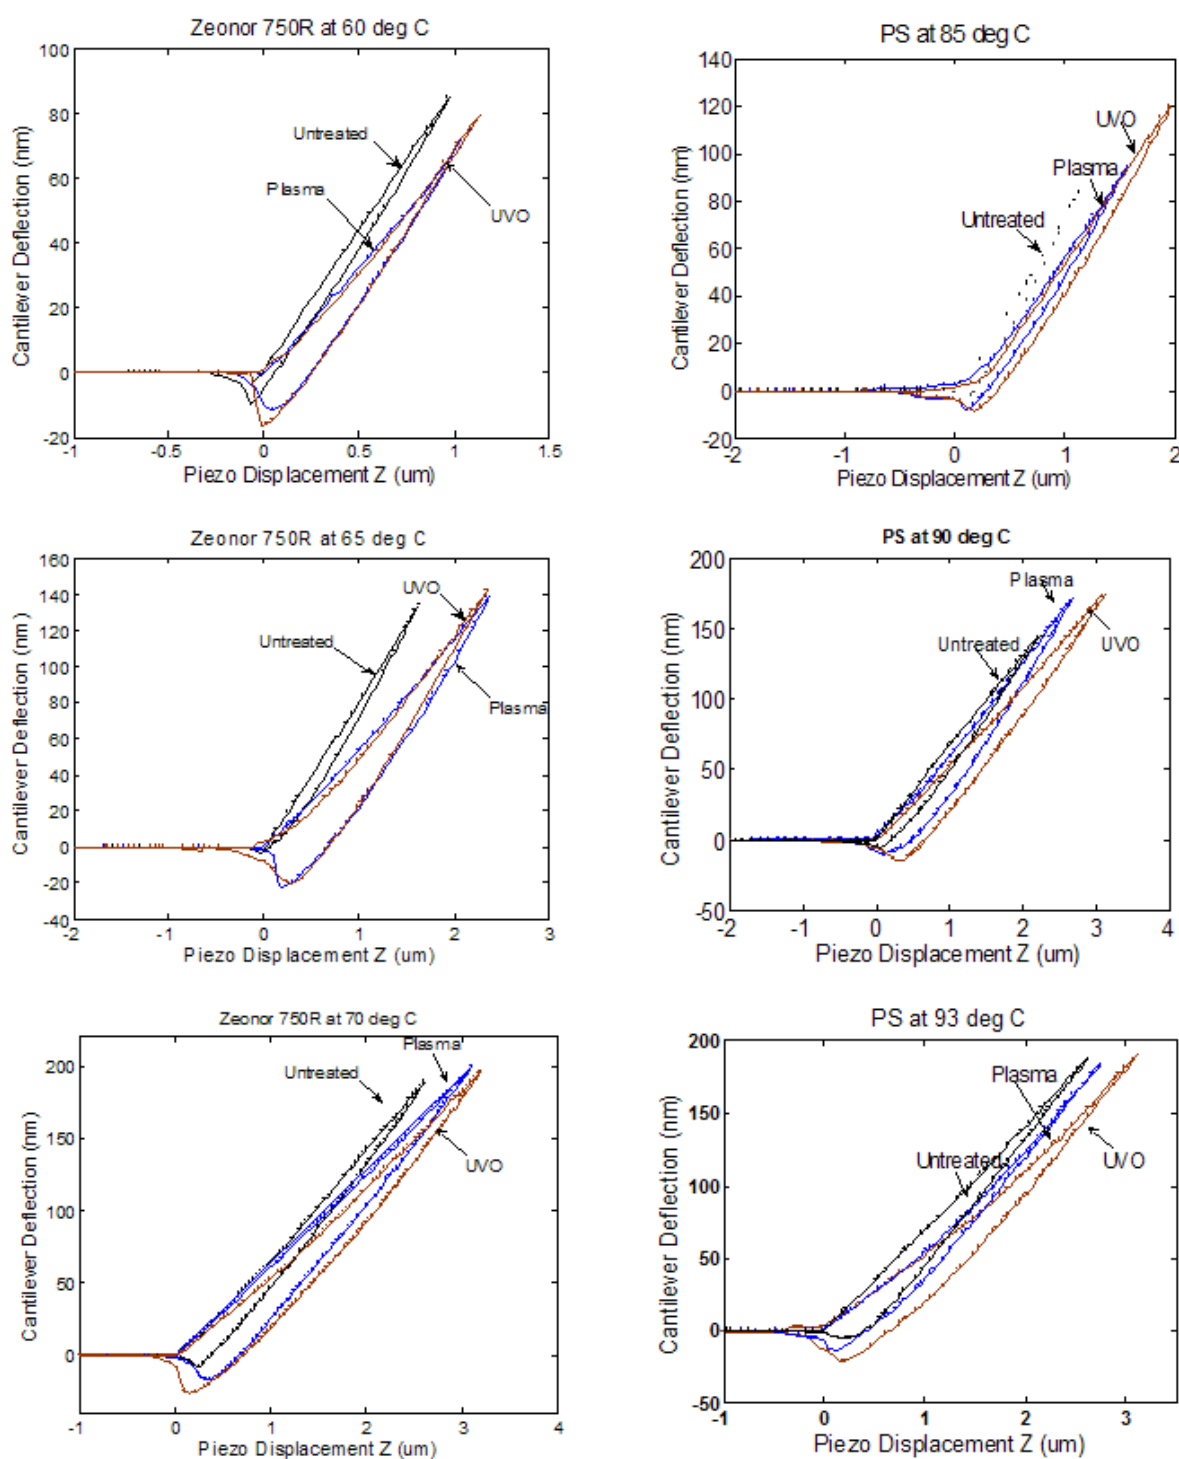

**Fig. S3** AFM force-distance curves obtained from untreated, plasma and UVO treated Zeonor 750R and polystyrene

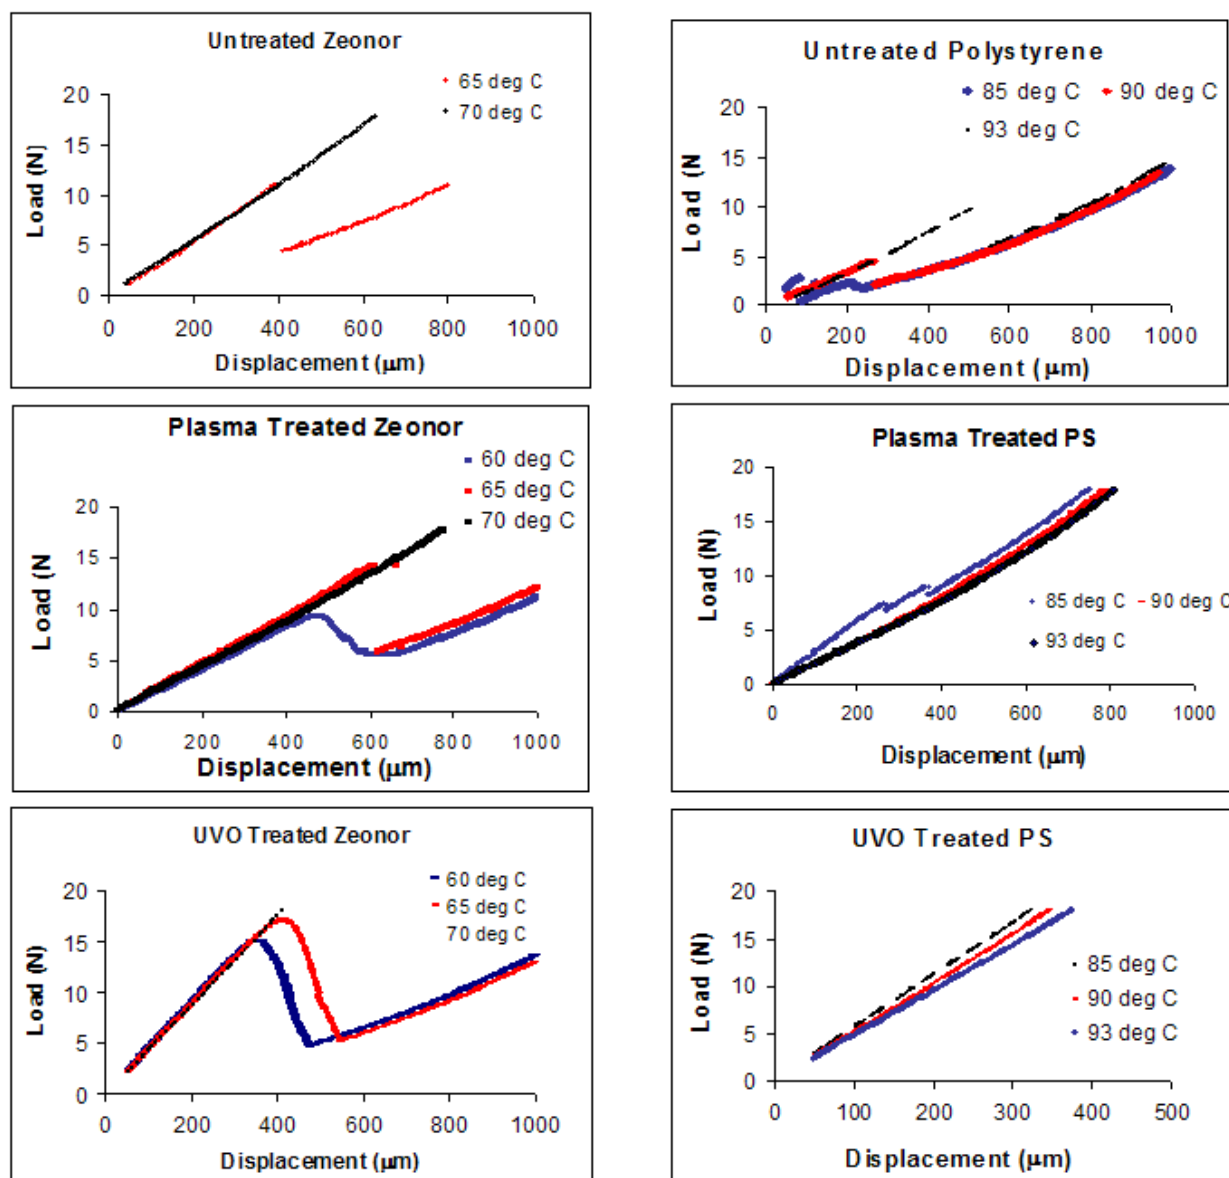

Fig. S4 DMA load-displacement curves for Zeonor 750R and polystyrene samples
